# Supplementary material for: Virulence Traits and Population Genomics of the Black Yeast Aureobasidium melanogenum
Source: J Fungi (Basel). 2021 Aug 16;7(8):665. doi: 10.3390/jof7080665 (PMC8401163; doi:10.3390/jof7080665)
Supplement: Supplementary file 1 [file jof-07-00665-s001.zip › jof-1291805-supplementary.pdf]

Table S1: Growth of selected *Aureobasidium* strains on YNB medium, hemolytic activity and siderophore production at 24 °C and 37 °C.

| Culture collection strain number | growth on YNB |       | hemolytic activity |       | siderophore production |       |
|----------------------------------|---------------|-------|--------------------|-------|------------------------|-------|
|                                  | 24 °C         | 37 °C | 24 °C              | 37 °C | 24 °C                  | 37 °C |
| <b>EXF-2481</b>                  | +             | NG    | $\alpha$           | NG    | 1,15                   | NG    |
| <b>EXF-4632</b>                  | +             | NG    | $\alpha$           | NG    | 2,41                   | NG    |
| <b>EXF-12298</b>                 | +             | NG    | $\alpha$           | NG    | 1,28                   | NG    |
| <b>EXF-150</b>                   | +             | NG    | $\alpha$           | NG    | 1,67                   | NG    |
| <b>EXF-3670</b>                  | +             | NG    | $\alpha$           | NG    | -                      | NG    |
| <b>EXF-10629</b>                 | +             | NG    | $\alpha$           | NG    | 1,20                   | NG    |
| <b>EXF-11318</b>                 | +             | NG    | $\alpha$           | NG    | 1,16                   | NG    |
| <b>EXF-5629</b>                  | +             | NG    | $\alpha$           | NG    | 1,26                   | NG    |
| <b>EXF-3398</b>                  | +             | NG    | $\alpha$           | NG    | 2,11                   | NG    |

Legend: + growth, - no production, NG – no growth.

Table S2: Assimilation of hydrocarbons (n-hexadecane and mineral oil) of selected *Aureobasidium* species.

| Culture collection strain number | n-hexadecane | mineral oil |
|----------------------------------|--------------|-------------|
| <b>EXF-2481</b>                  | -            | -           |
| <b>EXF-4632</b>                  | -            | -           |
| <b>EXF-12298</b>                 | -            | -           |
| <b>EXF-150</b>                   | -            | -           |
| <b>EXF-3670</b>                  | +            | +           |
| <b>EXF-10629</b>                 | -            | -           |
| <b>EXF-11318</b>                 | -            | -           |
| <b>EXF-5629</b>                  | -            | -           |
| <b>EXF-3398</b>                  | +            | +           |

Legend: + assimilation, - no assimilation.

Table S3: Assimilation of neurotransmitters (acetylcholine – ACh,  $\gamma$ -aminobutyric acid – GABA, glycine – Gly, glutamate – Glu, dopamine – DA) of selected *Aureobasidium* species at 24 °C and 37 °C.

|                                         | 24 °C      |             |            |            |           | 37 °C      |             |            |            |           |
|-----------------------------------------|------------|-------------|------------|------------|-----------|------------|-------------|------------|------------|-----------|
| <b>Culture collection strain number</b> | <b>Ach</b> | <b>GABA</b> | <b>Gly</b> | <b>Glu</b> | <b>DA</b> | <b>Ach</b> | <b>GABA</b> | <b>Gly</b> | <b>Glu</b> | <b>DA</b> |
| <b>EXF-2481</b>                         | +          | +           | -          | +          | +         | NG         | NG          | NG         | NG         | NG        |
| <b>EXF-4632</b>                         | +          | -           | -          | +          | NG        | NG         | NG          | NG         | NG         | NG        |
| <b>EXF-12298</b>                        | +          | +           | +          | +          | =         | NG         | NG          | NG         | NG         | NG        |
| <b>EXF-150</b>                          | +          | +           | =          | +          | =         | NG         | NG          | NG         | NG         | NG        |
| <b>EXF-3670</b>                         | +          | +           | =          | +          | +         | NG         | NG          | NG         | NG         | NG        |
| <b>EXF-10629</b>                        | +          | +           | =          | =          | NG        | NG         | NG          | NG         | NG         | NG        |
| <b>EXF-11318</b>                        | +          | +           | =          | =          | =         | NG         | NG          | NG         | NG         | NG        |
| <b>EXF-5629</b>                         | +          | -           | -          | -          | NG        | NG         | NG          | NG         | NG         | NG        |
| <b>EXF-3398</b>                         | +          | +           |            | +          | +         | NG         | NG          | NG         | NG         | NG        |

Legend: + better growth, = similar growth, - worse growth, NG – no growth.

Table S4: Found non-ribosomal protein synthase (NRPS) genes with adenylation domains (A domains) similar to those of genes encoding proteins SidC and SidD in *A. melanogenum* genomes.

| <b>Present study number</b> | <b>SidC</b> | <b>SidD</b> | <b>both</b> |
|-----------------------------|-------------|-------------|-------------|
| <b>1</b>                    | 1           | 1           | 2           |
| <b>2</b>                    | 1           | 2           | 3           |
| <b>3</b>                    | 1           | 1           | 2           |
| <b>4</b>                    | 1           | 1           | 2           |
| <b>5</b>                    | 1           | 1           | 2           |
| <b>6</b>                    | 2           | 2           | 4           |
| <b>7</b>                    | 1           | 1           | 2           |
| <b>8</b>                    | 2           | 2           | 4           |
| <b>9</b>                    | 3           | 2           | 5           |
| <b>10</b>                   | 2           | 2           | 4           |
| <b>11</b>                   | 1           | 1           | 2           |
| <b>12</b>                   | 1           | 1           | 2           |
| <b>13</b>                   | 1           | 1           | 2           |
| <b>14</b>                   | 1           | 1           | 2           |
| <b>15</b>                   | 1           | 1           | 2           |
| <b>16</b>                   | 3           | 2           | 5           |
| <b>17</b>                   | 3           | 2           | 5           |
| <b>18</b>                   | 1           | 1           | 2           |
| <b>19</b>                   | 2           | 2           | 4           |
| <b>20</b>                   | 3           | 2           | 5           |
| <b>21</b>                   | 3           | 2           | 5           |
| <b>22</b>                   | 3           | 2           | 5           |
| <b>23</b>                   | 3           | 2           | 5           |
| <b>24</b>                   | 3           | 2           | 5           |
| <b>25</b>                   | 1           | 1           | 2           |
| <b>26</b>                   | 2           | 2           | 4           |
| <b>27</b>                   | 1           | 1           | 2           |
| <b>28</b>                   | 2           | 1           | 3           |
| <b>29</b>                   | 2           | 2           | 4           |
| <b>30</b>                   | 2           | 2           | 4           |
| <b>31</b>                   | 3           | 2           | 5           |
| <b>32</b>                   | 2           | 1           | 3           |
| <b>33</b>                   | 3           | 2           | 5           |
| <b>34</b>                   | 2           | 2           | 4           |
| <b>35</b>                   | 1           | 2           | 3           |
| <b>36</b>                   | 2           | 2           | 4           |
| <b>37</b>                   | 3           | 2           | 5           |
| <b>38</b>                   | 1           | 2           | 3           |
| <b>39</b>                   | 2           | 2           | 4           |
| <b>40</b>                   | 1           | 1           | 2           |
| <b>41</b>                   | 2           | 2           | 4           |
| <b>42</b>                   | 2           | 2           | 4           |

|           |   |   |   |
|-----------|---|---|---|
| <b>43</b> | 3 | 2 | 5 |
| <b>44</b> | 3 | 2 | 5 |
| <b>45</b> | 3 | 2 | 5 |
| <b>46</b> | 3 | 2 | 5 |
| <b>47</b> | 1 | 2 | 3 |
| <b>48</b> | 1 | 1 | 2 |
| <b>49</b> | 3 | 2 | 5 |

Table S5: Found hemolysins homologues from three different groups in *A. melanogenum* genome.

| <b>Present study number</b> | <b>First group</b> | <b>Second group</b> | <b>Third group</b> |
|-----------------------------|--------------------|---------------------|--------------------|
| <b>1</b>                    | 1                  | 1                   | 2                  |
| <b>2</b>                    | 0                  | 1                   | 2                  |
| <b>3</b>                    | 1                  | 1                   | 2                  |
| <b>4</b>                    | 1                  | 1                   | 2                  |
| <b>5</b>                    | 1                  | 1                   | 2                  |
| <b>6</b>                    | 2                  | 2                   | 6                  |
| <b>7</b>                    | 1                  | 1                   | 2                  |
| <b>8</b>                    | 2                  | 2                   | 3                  |
| <b>9</b>                    | 1                  | 2                   | 4                  |
| <b>10</b>                   | 1                  | 2                   | 4                  |
| <b>11</b>                   | 1                  | 1                   | 2                  |
| <b>12</b>                   | 1                  | 1                   | 2                  |
| <b>13</b>                   | 1                  | 1                   | 2                  |
| <b>14</b>                   | 1                  | 1                   | 2                  |
| <b>15</b>                   | 1                  | 1                   | 2                  |
| <b>16</b>                   | 0                  | 2                   | 4                  |
| <b>17</b>                   | 1                  | 1                   | 4                  |
| <b>18</b>                   | 1                  | 1                   | 2                  |
| <b>19</b>                   | 1                  | 2                   | 4                  |
| <b>20</b>                   | 2                  | 1                   | 4                  |
| <b>21</b>                   | 2                  | 2                   | 4                  |
| <b>22</b>                   | 2                  | 2                   | 4                  |
| <b>23</b>                   | 2                  | 2                   | 4                  |
| <b>24</b>                   | 1                  | 1                   | 4                  |
| <b>25</b>                   | 1                  | 1                   | 2                  |
| <b>26</b>                   | 1                  | 3                   | 4                  |
| <b>27</b>                   | 1                  | 1                   | 2                  |
| <b>28</b>                   | 1                  | 1                   | 4                  |
| <b>29</b>                   | 2                  | 1                   | 4                  |
| <b>30</b>                   | 2                  | 1                   | 4                  |
| <b>31</b>                   | 2                  | 2                   | 4                  |
| <b>32</b>                   | 2                  | 1                   | 4                  |
| <b>33</b>                   | 2                  | 2                   | 4                  |

|           |   |   |   |
|-----------|---|---|---|
| <b>34</b> | 1 | 2 | 4 |
| <b>35</b> | 0 | 1 | 1 |
| <b>36</b> | 2 | 2 | 6 |
| <b>37</b> | 1 | 2 | 4 |
| <b>38</b> | 0 | 1 | 2 |
| <b>39</b> | 1 | 2 | 4 |
| <b>40</b> | 1 | 1 | 2 |
| <b>41</b> | 2 | 2 | 6 |
| <b>42</b> | 2 | 1 | 4 |
| <b>43</b> | 1 | 2 | 4 |
| <b>44</b> | 1 | 3 | 4 |
| <b>45</b> | 1 | 2 | 4 |
| <b>46</b> | 1 | 2 | 4 |
| <b>47</b> | 1 | 1 | 2 |
| <b>48</b> | 1 | 1 | 2 |
| <b>49</b> | 1 | 2 | 4 |

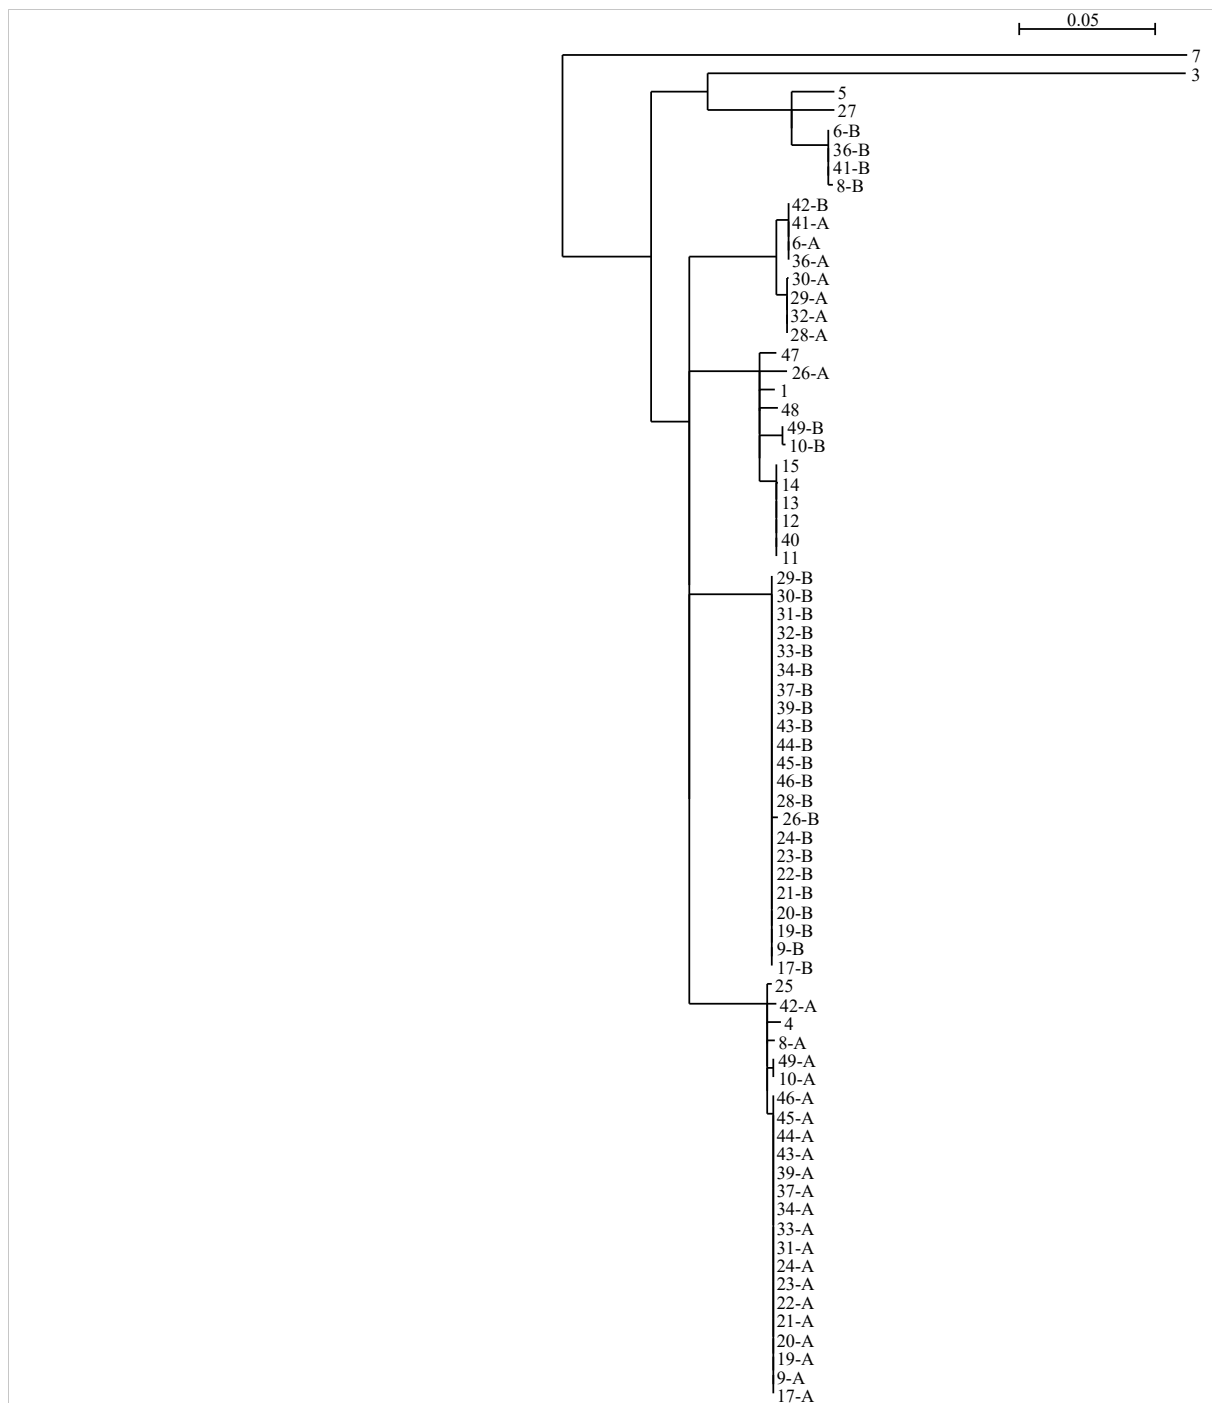

Figure S1: Majority rule consensus tree of *A. melanogenum* Benchmarking Universal Single-Copy Orthologs (BUSCOs). Strains 2, 16, 18, and 38 were excluded from the analysis due to a large share of their BUSCOs predicted as single-copy instead of in the expected two copies and strain 35 was excluded due to its large phylogenetic distance to other strains.

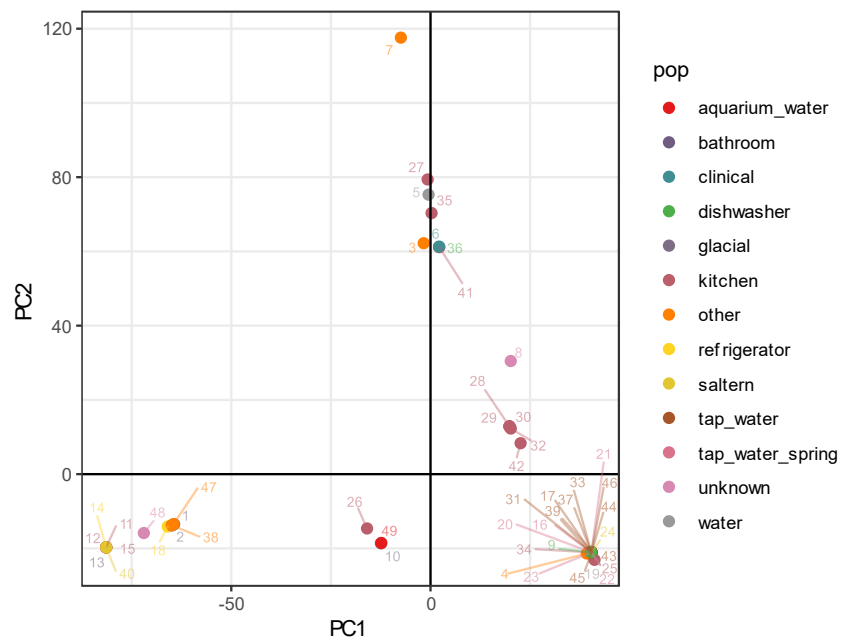

Figure S3: Clustering of *A. melanogenum* genomes. Principal component analysis of SNP data estimated by comparing the genomes to the reference *A. melanogenum* genome (EXF-3378). The genomes are represented by circles, the colour corresponds to the habitat. The axes explain 33,11% (horizontal) and 19,85% (vertical) of variation.

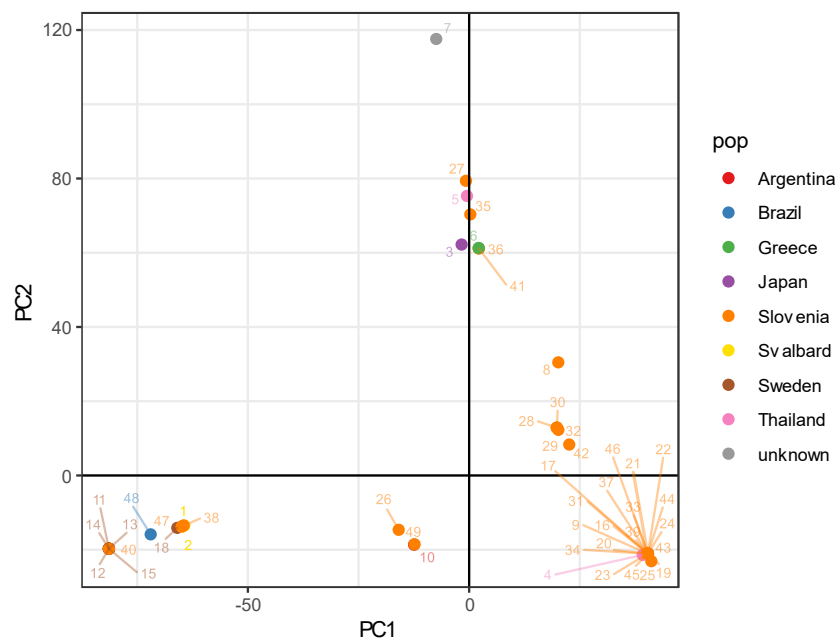

Figure S4: Clustering of *A. melanogenum* genomes. Principal component analysis of SNP data estimated by comparing the genomes to the reference *A. melanogenum* genome (EXF-3378). The genomes are represented by circles, the colour corresponds to the sampling location. The axes explain 33,11% (horizontal) and 19,85% (vertical) of variation.

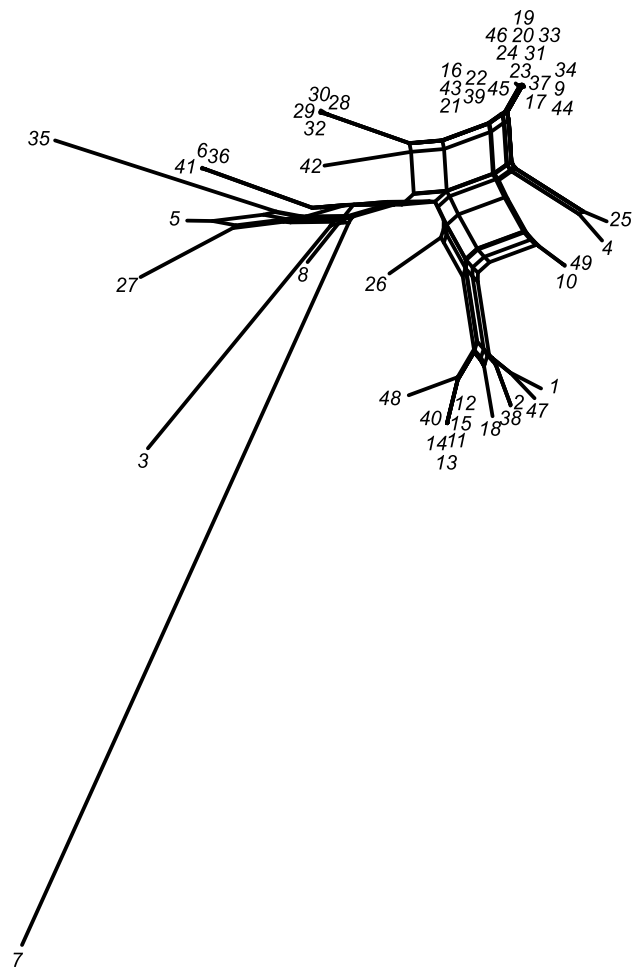

Figure S2: Phylogenetic network of sequenced *A. melanogenum* strains, reconstructed with the Neighbor-Net algorithm based on the dissimilarity distance matrix calculated from the SNP data.
